# Supplementary material for: Preparation of a Sustainable Shape-Stabilized Phase Change Material for Thermal Energy Storage Based on Mg2+-Doped CaCO3/PEG Composites
Source: MDPI journal article supplement (doi:10.3390/nano11071639), 2021-06-22
Supplement: s1 [file s1]

# Preparation of a Sustainable Shape-Stabilized Phase Change Material for Thermal Energy Storage Based on $\text{Mg}^{2+}$ -Doped $\text{CaCO}_3$ / PEG Composites

Md. Hasan Zahir <sup>1\*</sup>, Mohammad Mominur Rahman <sup>2</sup>, Salem K. S. Basamad <sup>3</sup>, Khaled Own Mohaisen<sup>4</sup>, Kashif Irshad <sup>1</sup>, Mohammad Mizanur Rahman <sup>5</sup>, Md Abdul Aziz <sup>6</sup>, Aasif Helal<sup>6</sup>, Amjad Ali <sup>1</sup>, Mohammad M. Hossain <sup>3,7</sup>

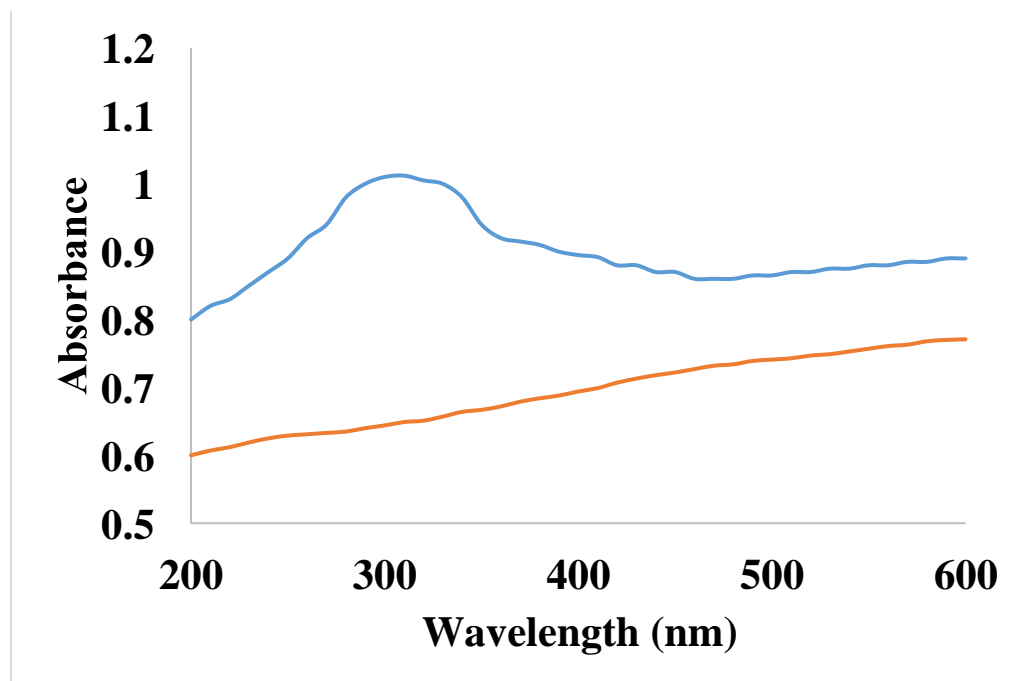

Figure S1. UV-vis adsorption spectra of PEG ( pink line) and P-10-MCC ( blue line).
